# Supplementary material for: Preparation of Amphiphilic Chitosan-Loaded Bentonite Adsorbent and Its Performance in Removing Organic Matter from Coking Wastewater
Source: MDPI journal article supplement (doi:10.3390/polym15061588), 2023-03-22
Supplement: s1 [file s1]

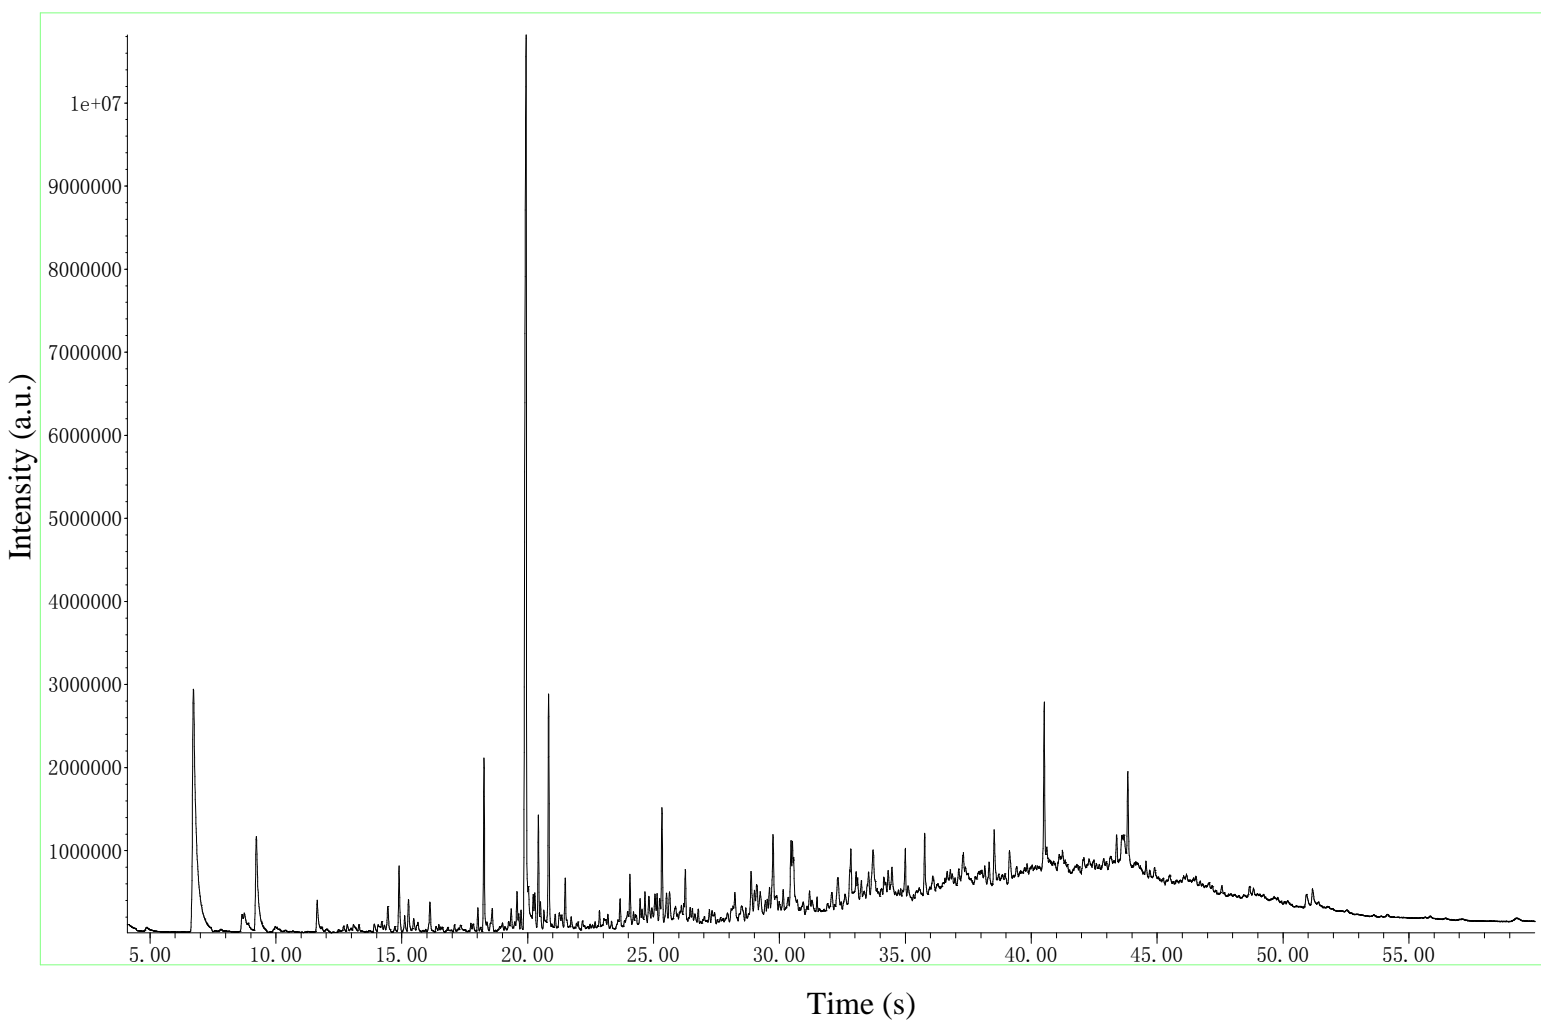

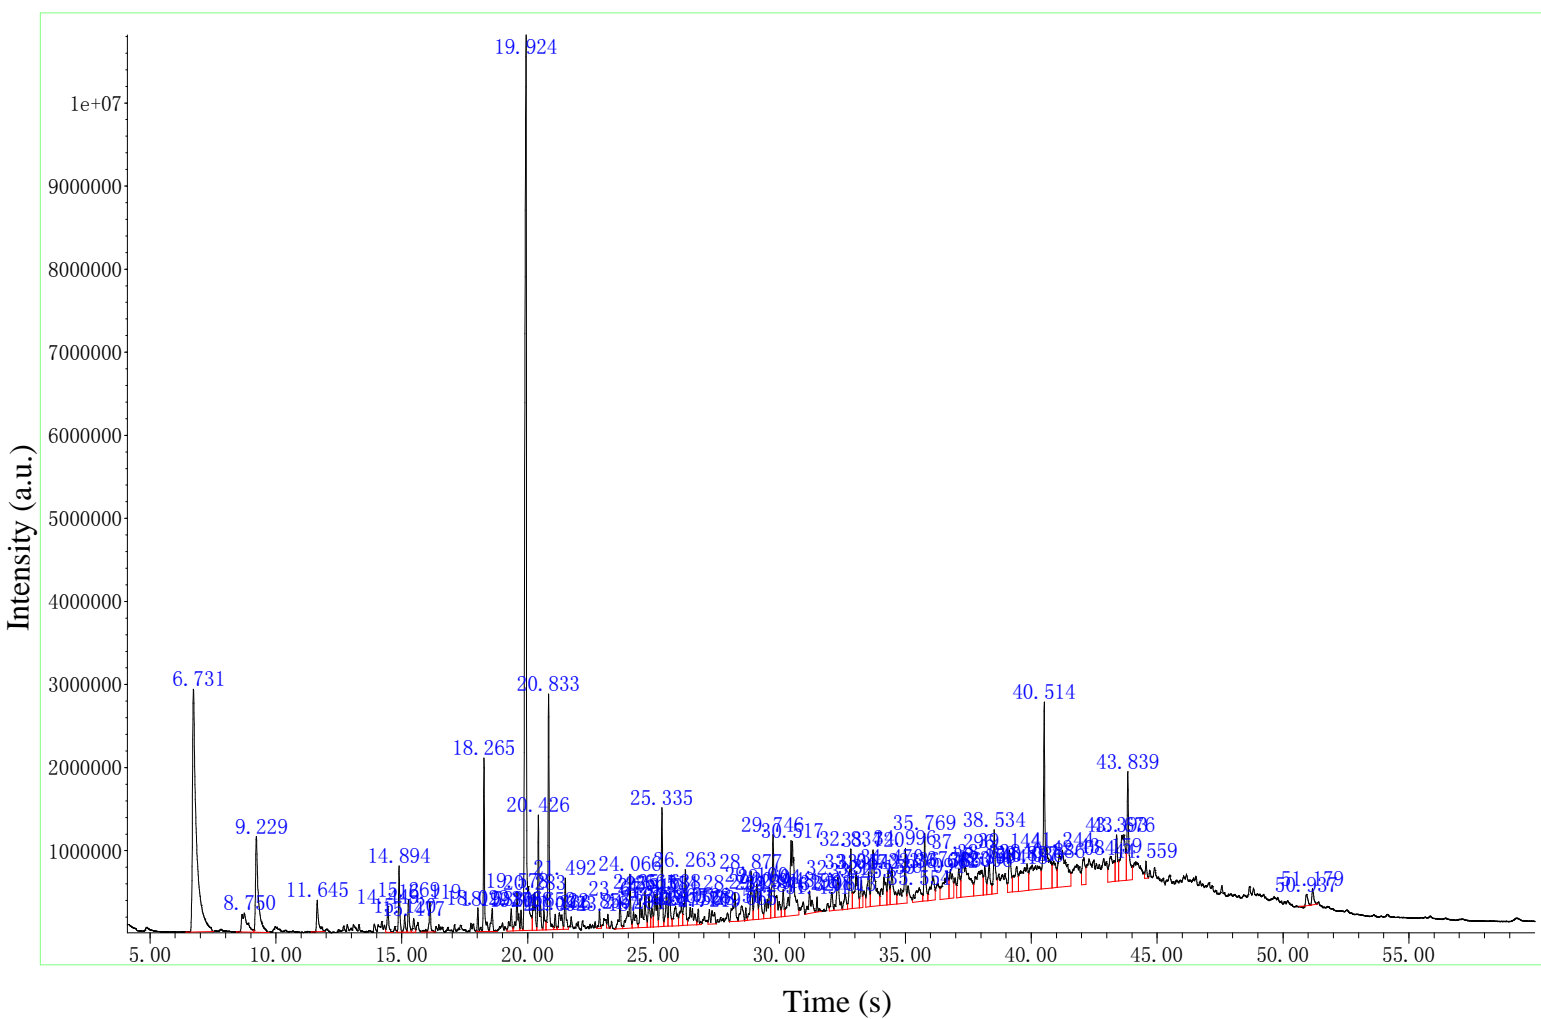

| No. | R. T.  | S%   | Spectrum Library/ID                                                                                                              | Reference#                | CAS#                                       | Match          |
|-----|--------|------|----------------------------------------------------------------------------------------------------------------------------------|---------------------------|--------------------------------------------|----------------|
| 1   | 6.728  | 8.55 | C:\MassHunter\Library\NIST14.L<br>Phenol<br>Phenol<br>Phenol                                                                     | 2620<br>2621<br>2619      | 000108-95-2<br>000108-95-2<br>000108-95-2  | 94<br>91<br>91 |
| 2   | 8.752  | 0.91 | C:\MassHunter\Library\NIST14.L<br>Phenol, 2-methyl-<br>Phenol, 3-methyl-<br>Phenol, 3-methyl-                                    | 5476<br>5469<br>5472      | 000095-48-7<br>000108-39-4<br>000108-39-4  | 94<br>83<br>52 |
| 3   | 9.228  | 2.33 | C:\MassHunter\Library\NIST14.L<br>p-Cresol<br>Phenol, 3-methyl-<br>p-Cresol                                                      | 5464<br>5469<br>5461      | 000106-44-5<br>000108-39-4<br>000106-44-5  | 97<br>96<br>96 |
| 4   | 11.646 | 0.53 | C:\MassHunter\Library\NIST14.L<br>Silane, cyclohexyldimethoxymethyl-<br>Silane, dimethoxydimethyl-<br>Silane, dimethoxydimethyl- | 55014<br>9350<br>9351     | 017865-32-6<br>001112-39-6<br>001112-39-6  | 87<br>47<br>40 |
| 5   | 14.451 | 0.38 | C:\MassHunter\Library\NIST14.L<br>Octane, 2,4,6-trimethyl-<br>Heptane, 2,4-dimethyl-<br>Tetradecane, 1-iodo-                     | 29378<br>12960<br>181794  | 062016-37-9<br>002213-23-2<br>019218-94-1  | 59<br>52<br>49 |
| 6   | 14.892 | 0.74 | C:\MassHunter\Library\NIST14.L<br>Nonane, 5-methyl-5-propyl-<br>Dodecane, 4,6-dimethyl-<br>Octane, 5-ethyl-2-methyl-             | 51475<br>63643<br>29382   | 017312-75-3<br>061141-72-8<br>062016-18-6  | 80<br>72<br>72 |
| 7   | 15.122 | 0.21 | C:\MassHunter\Library\NIST14.L<br>Dodecane<br>Tetradecane<br>Tridecane, 1-iodo-                                                  | 39973<br>63625<br>168440  | 000112-40-3<br>000629-59-4<br>035599-77-0  | 87<br>86<br>80 |
| 8   | 15.269 | 0.41 | C:\MassHunter\Library\NIST14.L<br>Indole<br>Indole<br>Benzyl nitrile                                                             | 8731<br>8734<br>8743      | 000120-72-9<br>000120-72-9<br>000140-29-4  | 91<br>90<br>60 |
| 9   | 15.475 | 0.20 | C:\MassHunter\Library\NIST14.L<br>Octane, 2-methyl-<br>Dodecane, 1-iodo-<br>Tridecane, 1-iodo-                                   | 12950<br>154845<br>168440 | 003221-61-2<br>004292-19-7<br>035599-77-0  | 64<br>59<br>59 |
| 10  | 16.116 | 0.45 | C:\MassHunter\Library\NIST14.L<br>Dodecane<br>Decane, 3,7-dimethyl-<br>Sulfurous acid, hexyl pentyl ester                        | 39972<br>39995<br>97941   | 000112-40-3<br>017312-54-8<br>1000309-14-1 | 91<br>72<br>64 |
| 11  | 18.022 | 0.26 | C:\MassHunter\Library\NIST14.L<br>Tetradecane<br>Tetradecane<br>Tetradecane                                                      | 63622<br>63623<br>63625   | 000629-59-4<br>000629-59-4<br>000629-59-4  | 98<br>96<br>96 |
| 12  | 18.263 | 1.69 | C:\MassHunter\Library\NIST14.L<br>Tetradecanal<br>Dodecanal<br>Dodecanal                                                         | 76509<br>51252<br>51251   | 000124-25-4<br>000112-54-9<br>000112-54-9  | 98<br>98<br>91 |
| 13  | 18.586 | 0.36 | C:\MassHunter\Library\NIST14.L<br>Heneicosane                                                                                    | 155888                    | 000629-94-7                                | 86             |

|    |        |       |                                                                                 |        |              |    |
|----|--------|-------|---------------------------------------------------------------------------------|--------|--------------|----|
|    |        |       | Nonadecane, 9-methyl-                                                           | 142247 | 013287-24-6  | 86 |
|    |        |       | Hexacosane                                                                      | 217890 | 000630-01-3  | 86 |
| 14 | 19.345 | 0.39  | C:\MassHunter\Library\NIST14.L<br>2-methyloctacosane                            | 242320 | 1000376-72-8 | 80 |
|    |        |       | Octadecane, 1-iodo-                                                             | 226952 | 000629-93-6  | 74 |
|    |        |       | Decane, 3,8-dimethyl-                                                           | 40006  | 017312-55-9  | 74 |
| 15 | 19.580 | 0.66  | C:\MassHunter\Library\NIST14.L<br>Hexadecane                                    | 89842  | 000544-76-3  | 91 |
|    |        |       | Hentriacontane                                                                  | 252712 | 000630-04-6  | 86 |
|    |        |       | Decane, 2,3,6-trimethyl-                                                        | 51446  | 062238-12-4  | 80 |
| 16 | 19.739 | 0.20  | C:\MassHunter\Library\NIST14.L<br>Tetradecane, 1-iodo-                          | 181793 | 019218-94-1  | 72 |
|    |        |       | Decane, 3,8-dimethyl-                                                           | 40006  | 017312-55-9  | 64 |
|    |        |       | Nonadecane, 9-methyl-                                                           | 142247 | 013287-24-6  | 58 |
| 17 | 19.921 | 13.74 | C:\MassHunter\Library\NIST14.L<br>1-Decene                                      | 18385  | 000872-05-9  | 95 |
|    |        |       | 1-Dodecanol                                                                     | 53012  | 000112-53-8  | 95 |
|    |        |       | 1-Dodecanol                                                                     | 53008  | 000112-53-8  | 95 |
| 18 | 20.286 | 0.78  | C:\MassHunter\Library\NIST14.L<br>Hexadecane                                    | 89842  | 000544-76-3  | 86 |
|    |        |       | Pentadecane                                                                     | 76609  | 000629-62-9  | 83 |
|    |        |       | Heptadecane                                                                     | 102598 | 000629-78-7  | 83 |
| 19 | 20.427 | 1.36  | C:\MassHunter\Library\NIST14.L<br>Dodecane, 2,6,11-trimethyl-                   | 76619  | 031295-56-4  | 59 |
|    |        |       | Heptadecane                                                                     | 102600 | 000629-78-7  | 59 |
|    |        |       | Sulfurous acid, 2-ethylhexyl isohe<br>xyl ester                                 | 137919 | 1000309-19-0 | 58 |
| 20 | 20.651 | 0.27  | C:\MassHunter\Library\NIST14.L<br>1-Iodo-2-methylundecane                       | 154846 | 073105-67-6  | 72 |
|    |        |       | Octadecane, 1-iodo-                                                             | 226953 | 000629-93-6  | 72 |
|    |        |       | Octane, 2,4,6-trimethyl-                                                        | 29378  | 062016-37-9  | 64 |
| 21 | 20.833 | 2.39  | C:\MassHunter\Library\NIST14.L<br>2,4-Di-tert-butylphenol                       | 70632  | 000096-76-4  | 96 |
|    |        |       | Phenol, 2,5-bis(1,1-dimethylethyl)                                              | 70651  | 005875-45-6  | 95 |
|    |        |       | 2,4-Di-tert-butylphenol                                                         | 70634  | 000096-76-4  | 95 |
| 22 | 21.092 | 0.18  | C:\MassHunter\Library\NIST14.L<br>Sulfurous acid, pentadecyl 2-propy<br>l ester | 191792 | 1000309-12-6 | 72 |
|    |        |       | Sulfurous acid, 2-propyl tridecyl<br>ester                                      | 164999 | 1000309-12-4 | 64 |
|    |        |       | Disulfide, di-tert-dodecyl                                                      | 239746 | 027458-90-8  | 64 |
| 23 | 21.268 | 0.45  | C:\MassHunter\Library\NIST14.L<br>Tetratetracontane                             | 273586 | 007098-22-8  | 87 |
|    |        |       | Hentriacontane                                                                  | 252712 | 000630-04-6  | 87 |
|    |        |       | Heptacosane                                                                     | 227468 | 000593-49-7  | 86 |
| 24 | 21.492 | 0.62  | C:\MassHunter\Library\NIST14.L<br>Heneicosane                                   | 155888 | 000629-94-7  | 80 |
|    |        |       | Dodecane, 1-iodo-                                                               | 154845 | 004292-19-7  | 64 |
|    |        |       | Hexane, 2,3,4-trimethyl-                                                        | 12990  | 000921-47-1  | 58 |
| 25 | 22.857 | 0.20  | C:\MassHunter\Library\NIST14.L                                                  |        |              |    |

|    |        |      |                                    |        |              |    |
|----|--------|------|------------------------------------|--------|--------------|----|
|    |        |      | Hexadecane                         | 89843  | 000544-76-3  | 94 |
|    |        |      | Hexadecane                         | 89840  | 000544-76-3  | 92 |
|    |        |      | Hexadecane                         | 89838  | 000544-76-3  | 92 |
| 26 | 23.186 | 0.14 | C:\MassHunter\Library\NIST14.L     |        |              |    |
|    |        |      | Tridecanol, 2-ethyl-2-methyl-      | 104449 | 1000115-66-1 | 52 |
|    |        |      | Pentacosane                        | 207499 | 000629-99-2  | 52 |
|    |        |      | Heneicosane                        | 155888 | 000629-94-7  | 52 |
| 27 | 23.674 | 0.47 | C:\MassHunter\Library\NIST14.L     |        |              |    |
|    |        |      | Heneicosane                        | 155888 | 000629-94-7  | 87 |
|    |        |      | 2-Bromo dodecane                   | 109279 | 013187-99-0  | 87 |
|    |        |      | Hexadecane                         | 89844  | 000544-76-3  | 86 |
| 28 | 24.068 | 0.98 | C:\MassHunter\Library\NIST14.L     |        |              |    |
|    |        |      | Tributyl phosphate                 | 126012 | 000126-73-8  | 83 |
|    |        |      | Tributyl phosphate                 | 126014 | 000126-73-8  | 80 |
|    |        |      | Tributyl phosphate                 | 126016 | 000126-73-8  | 80 |
| 29 | 24.204 | 0.44 | C:\MassHunter\Library\NIST14.L     |        |              |    |
|    |        |      | Dodecane, 2-methyl-                | 51414  | 001560-97-0  | 91 |
|    |        |      | Decane, 2,3,7-trimethyl-           | 51447  | 062238-13-5  | 86 |
|    |        |      | Nonadecane                         | 128834 | 000629-92-5  | 83 |
| 30 | 24.662 | 1.02 | C:\MassHunter\Library\NIST14.L     |        |              |    |
|    |        |      | Heneicosane                        | 155887 | 000629-94-7  | 90 |
|    |        |      | Heneicosane                        | 155888 | 000629-94-7  | 87 |
|    |        |      | Tetracosane                        | 195669 | 000646-31-1  | 86 |
| 31 | 24.815 | 0.47 | C:\MassHunter\Library\NIST14.L     |        |              |    |
|    |        |      | Nonadecane                         | 128835 | 000629-92-5  | 90 |
|    |        |      | Hexadecane                         | 89844  | 000544-76-3  | 80 |
|    |        |      | Heneicosane                        | 155888 | 000629-94-7  | 80 |
| 32 | 24.939 | 0.28 | C:\MassHunter\Library\NIST14.L     |        |              |    |
|    |        |      | Hexacosane                         | 217890 | 000630-01-3  | 87 |
|    |        |      | Octacosane                         | 235614 | 000630-02-4  | 81 |
|    |        |      | Triacontane                        | 247876 | 000638-68-6  | 72 |
| 33 | 25.139 | 0.81 | C:\MassHunter\Library\NIST14.L     |        |              |    |
|    |        |      | Dodecane, 2-methyl-                | 51414  | 001560-97-0  | 83 |
|    |        |      | Heneicosane                        | 155888 | 000629-94-7  | 80 |
|    |        |      | Octadecane, 1-iodo-                | 226953 | 000629-93-6  | 80 |
| 34 | 25.333 | 1.51 | C:\MassHunter\Library\NIST14.L     |        |              |    |
|    |        |      | Heneicosane                        | 155888 | 000629-94-7  | 90 |
|    |        |      | Heptadecane, 2,6,10,15-tetramethyl | 155904 | 054833-48-6  | 86 |
|    |        |      | Hexadecane, 1-iodo-                | 206779 | 000544-77-4  | 72 |
| 35 | 25.515 | 0.51 | C:\MassHunter\Library\NIST14.L     |        |              |    |
|    |        |      | 2-Bromotetradecane                 | 136205 | 074036-95-6  | 86 |
|    |        |      | Heptadecane                        | 102600 | 000629-78-7  | 80 |
|    |        |      | Heneicosane                        | 155888 | 000629-94-7  | 80 |
| 36 | 25.639 | 0.55 | C:\MassHunter\Library\NIST14.L     |        |              |    |
|    |        |      | Dotriacontane, 1-iodo-             | 272203 | 1000406-32-4 | 46 |
|    |        |      | Decane, 3,8-dimethyl-              | 40006  | 017312-55-9  | 46 |
|    |        |      | Hentriacontane                     | 252712 | 000630-04-6  | 46 |
| 37 | 25.868 | 0.58 | C:\MassHunter\Library\NIST14.L     |        |              |    |
|    |        |      | Tridecanol, 2-ethyl-2-methyl-      | 104449 | 1000115-66-1 | 80 |
|    |        |      | Heneicosane                        | 155888 | 000629-94-7  | 80 |

|    |        |      |                                                                                                                                                                      |                            |                                              |                |
|----|--------|------|----------------------------------------------------------------------------------------------------------------------------------------------------------------------|----------------------------|----------------------------------------------|----------------|
|    |        |      | Hexacosane                                                                                                                                                           | 217891                     | 000630-01-3                                  | 80             |
| 38 | 26.103 | 0.44 | C:\MassHunter\Library\NIST14.L<br>Heneicosane<br>Hexacosane<br>Heptacosane                                                                                           | 155888<br>217890<br>227468 | 000629-94-7<br>000630-01-3<br>000593-49-7    | 87<br>87<br>83 |
| 39 | 26.262 | 0.81 | C:\MassHunter\Library\NIST14.L<br>1,3-Propanediol, ethyl hexadecyl ether<br>Heneicosane<br>Pentacosane                                                               | 186677<br>155888<br>207499 | 1000406-35-3<br>000629-94-7<br>000629-99-2   | 86<br>86<br>86 |
| 40 | 26.456 | 0.65 | C:\MassHunter\Library\NIST14.L<br>Dodecane, 2-methyl-<br>Octacosane<br>Nonane, 5-butyl-                                                                              | 51414<br>235614<br>51397   | 001560-97-0<br>000630-02-4<br>017312-63-9    | 87<br>87<br>86 |
| 41 | 26.774 | 0.21 | C:\MassHunter\Library\NIST14.L<br>Octadecane<br>Heneicosane<br>2-Bromotetradecane                                                                                    | 115545<br>155888<br>136205 | 000593-45-3<br>000629-94-7<br>074036-95-6    | 64<br>64<br>64 |
| 42 | 27.221 | 0.48 | C:\MassHunter\Library\NIST14.L<br>Octadecane<br>Octadecane<br>Octadecane                                                                                             | 115546<br>115547<br>115545 | 000593-45-3<br>000593-45-3<br>000593-45-3    | 96<br>96<br>93 |
| 43 | 28.233 | 0.73 | C:\MassHunter\Library\NIST14.L<br>Heneicosane<br>Hexadecane<br>2-methyloctacosane                                                                                    | 155888<br>89844<br>242320  | 000629-94-7<br>000544-76-3<br>1000376-72-8   | 90<br>83<br>80 |
| 44 | 28.503 | 0.41 | C:\MassHunter\Library\NIST14.L<br>Octacosane<br>Hentriacontane<br>Hexacosane                                                                                         | 235614<br>252711<br>217890 | 000630-02-4<br>000630-04-6<br>000630-01-3    | 91<br>91<br>91 |
| 45 | 28.668 | 0.12 | C:\MassHunter\Library\NIST14.L<br>Phthalic acid, butyl tetradecyl ester<br>Phthalic acid, butyl undecyl ester<br>Phthalic acid, 2,4-dimethylpent-3-yl isobutyl ester | 246447<br>224935<br>178903 | 1000308-91-3<br>1000308-91-2<br>1000356-84-3 | 80<br>80<br>72 |
| 46 | 28.880 | 0.80 | C:\MassHunter\Library\NIST14.L<br>Hexadecane, 1-chloro-<br>Octadecane, 1-chloro-<br>Tritetracontane                                                                  | 121204<br>148105<br>273205 | 004860-03-1<br>003386-33-2<br>007098-21-7    | 96<br>91<br>91 |
| 47 | 29.097 | 0.94 | C:\MassHunter\Library\NIST14.L<br>Eicosane<br>Octacosane<br>Pentadecane, 2,6,10-trimethyl-                                                                           | 142238<br>235614<br>115565 | 000112-95-8<br>000630-02-4<br>003892-00-0    | 91<br>91<br>90 |
| 48 | 29.238 | 0.57 | C:\MassHunter\Library\NIST14.L<br>Heptadecane<br>Heneicosane<br>Eicosane                                                                                             | 102599<br>155888<br>142238 | 000629-78-7<br>000629-94-7<br>000112-95-8    | 94<br>93<br>91 |
| 49 | 29.603 | 0.81 | C:\MassHunter\Library\NIST14.L<br>Pentacosane                                                                                                                        | 207499                     | 000629-99-2                                  | 91             |

|    |        |      |                                    |        |              |    |
|----|--------|------|------------------------------------|--------|--------------|----|
|    |        |      | Eicosane, 2-methyl-                | 155892 | 001560-84-5  | 90 |
|    |        |      | Octadecane, 1-iodo-                | 226951 | 000629-93-6  | 87 |
| 50 | 29.744 | 1.29 | C:\MassHunter\Library\NIST14.L     |        |              |    |
|    |        |      | Octacosane                         | 235614 | 000630-02-4  | 90 |
|    |        |      | Octadecane, 1-iodo-                | 226953 | 000629-93-6  | 90 |
|    |        |      | Eicosane                           | 142238 | 000112-95-8  | 72 |
| 51 | 29.874 | 0.69 | C:\MassHunter\Library\NIST14.L     |        |              |    |
|    |        |      | Octacosane                         | 235614 | 000630-02-4  | 87 |
|    |        |      | Hexacosane                         | 217891 | 000630-01-3  | 87 |
|    |        |      | Eicosane, 1-iodo-                  | 241993 | 1000406-31-8 | 87 |
| 52 | 30.150 | 0.39 | C:\MassHunter\Library\NIST14.L     |        |              |    |
|    |        |      | Benzenepropanoic acid, 3,5-bis(1,1 | 151926 | 006386-38-5  | 97 |
|    |        |      | -dimethylethyl)-4-hydroxy-, methyl |        |              |    |
|    |        |      | ester                              |        |              |    |
|    |        |      | Benzenepropanoic acid, 3,5-bis(1,1 | 151925 | 006386-38-5  | 91 |
|    |        |      | -dimethylethyl)-4-hydroxy-, methyl |        |              |    |
|    |        |      | ester                              |        |              |    |
|    |        |      | Benzenepropanoic acid, 3,5-bis(1,1 | 151924 | 006386-38-5  | 78 |
|    |        |      | -dimethylethyl)-4-hydroxy-, methyl |        |              |    |
|    |        |      | ester                              |        |              |    |
| 53 | 30.515 | 2.90 | C:\MassHunter\Library\NIST14.L     |        |              |    |
|    |        |      | Dibutyl phthalate                  | 138057 | 000084-74-2  | 95 |
|    |        |      | Dibutyl phthalate                  | 138058 | 000084-74-2  | 94 |
|    |        |      | 1,2-Benzenedicarboxylic acid, buty | 192151 | 000084-78-6  | 86 |
|    |        |      | l octyl ester                      |        |              |    |
| 54 | 31.197 | 0.63 | C:\MassHunter\Library\NIST14.L     |        |              |    |
|    |        |      | Eicosane                           | 142239 | 000112-95-8  | 89 |
|    |        |      | Octadecane, 1-chloro-              | 148105 | 003386-33-2  | 64 |
|    |        |      | Hexacosane                         | 217890 | 000630-01-3  | 50 |
| 55 | 31.491 | 0.17 | C:\MassHunter\Library\NIST14.L     |        |              |    |
|    |        |      | 2-Bromo dodecane                   | 109279 | 013187-99-0  | 70 |
|    |        |      | Dotriacontane, 1-iodo-             | 272203 | 1000406-32-4 | 68 |
|    |        |      | Heneicosane                        | 155886 | 000629-94-7  | 68 |
| 56 | 32.079 | 0.32 | C:\MassHunter\Library\NIST14.L     |        |              |    |
|    |        |      | Benzo[d]pyrazolo[3,4-b]azepin-3(2H | 90344  | 263550-89-6  | 70 |
|    |        |      | )-one, 5,6-dihydro-5,5-dimethyl-   |        |              |    |
|    |        |      | Dicyclopenta[a,d]benzene, 4,8-diet | 104478 | 1000156-41-6 | 70 |
|    |        |      | hyl-1,5-dimethyl-                  |        |              |    |
|    |        |      | 5-Methoxy-2-methyl-4-oxo-1,2,3,4-t | 104038 | 1000227-06-0 | 49 |
|    |        |      | etrahydro-1,10-phenanthroline      |        |              |    |
| 57 | 32.321 | 0.78 | C:\MassHunter\Library\NIST14.L     |        |              |    |
|    |        |      | Fluoranthene                       | 66901  | 000206-44-0  | 83 |
|    |        |      | Hexadecane, 2,6,10,14-tetramethyl- | 142261 | 000638-36-8  | 64 |
|    |        |      | Benzene, 1,1'-(1,3-butadiyne-1,4-d | 66906  | 000886-66-8  | 52 |
|    |        |      | iy)bis-                            |        |              |    |
| 58 | 32.615 | 0.33 | C:\MassHunter\Library\NIST14.L     |        |              |    |
|    |        |      | Hexadecane, 2-methyl-              | 102609 | 001560-92-5  | 89 |
|    |        |      | Dotriacontane, 1-iodo-             | 272203 | 1000406-32-4 | 87 |
|    |        |      | 2-methyloctacosane                 | 242320 | 1000376-72-8 | 83 |
| 59 | 32.832 | 1.01 | C:\MassHunter\Library\NIST14.L     |        |              |    |
|    |        |      | 1-Octadecene                       | 113633 | 000112-88-9  | 97 |
|    |        |      | Z-8-Hexadecene                     | 87835  | 1000130-87-5 | 95 |

|    |        |      |                                          |        |              |    |
|----|--------|------|------------------------------------------|--------|--------------|----|
|    |        |      | Pentadecafluorooctanoic acid, octa       | 274630 | 1000406-04-8 | 93 |
|    |        |      | decyl ester                              |        |              |    |
| 60 | 33.050 | 1.12 | C:\MassHunter\Library\NIST14.L           |        |              |    |
|    |        |      | Heneicosane                              | 155886 | 000629-94-7  | 97 |
|    |        |      | Hexadecane, 2,6,10,14-tetramethyl-       | 142261 | 000638-36-8  | 91 |
|    |        |      | Nonadecane, 9-methyl-                    | 142247 | 013287-24-6  | 90 |
| 61 | 33.250 | 0.44 | C:\MassHunter\Library\NIST14.L           |        |              |    |
|    |        |      | Pyrene                                   | 66899  | 000129-00-0  | 91 |
|    |        |      | Pyrene                                   | 66896  | 000129-00-0  | 83 |
|    |        |      | Pyrene                                   | 66897  | 000129-00-0  | 64 |
| 62 | 33.544 | 0.73 | C:\MassHunter\Library\NIST14.L           |        |              |    |
|    |        |      | Hentriacontane                           | 252711 | 000630-04-6  | 91 |
|    |        |      | Octacosane                               | 235614 | 000630-02-4  | 91 |
|    |        |      | Dotriacontane, 1-iodo-                   | 272203 | 1000406-32-4 | 90 |
| 63 | 33.721 | 1.86 | C:\MassHunter\Library\NIST14.L           |        |              |    |
|    |        |      | Hentriacontane                           | 252711 | 000630-04-6  | 70 |
|    |        |      | Pentacosane                              | 207499 | 000629-99-2  | 70 |
|    |        |      | Eicosane                                 | 142238 | 000112-95-8  | 62 |
| 64 | 34.162 | 0.97 | C:\MassHunter\Library\NIST14.L           |        |              |    |
|    |        |      | Heptadecane, 3-methyl-                   | 115552 | 006418-44-6  | 83 |
|    |        |      | Nonadecane, 1-chloro-                    | 161769 | 062016-76-6  | 83 |
|    |        |      | 1-Bromodocosane                          | 232142 | 006938-66-5  | 74 |
| 65 | 34.321 | 0.53 | C:\MassHunter\Library\NIST14.L           |        |              |    |
|    |        |      | Octacosane                               | 235614 | 000630-02-4  | 91 |
|    |        |      | Hentriacontane                           | 252711 | 000630-04-6  | 91 |
|    |        |      | 2-methyloctacosane                       | 242320 | 1000376-72-8 | 90 |
| 66 | 34.468 | 0.96 | C:\MassHunter\Library\NIST14.L           |        |              |    |
|    |        |      | Octacosane                               | 235614 | 000630-02-4  | 91 |
|    |        |      | Octadecane                               | 115547 | 000593-45-3  | 86 |
|    |        |      | Hentriacontane                           | 252711 | 000630-04-6  | 86 |
| 67 | 34.997 | 1.24 | C:\MassHunter\Library\NIST14.L           |        |              |    |
|    |        |      | Cycloeicosane                            | 140274 | 000296-56-0  | 95 |
|    |        |      | 1-Octadecene                             | 113633 | 000112-88-9  | 91 |
|    |        |      | 2-Chloropropionic acid, hexadecyl ester  | 190088 | 086711-81-1  | 91 |
| 68 | 35.556 | 0.68 | C:\MassHunter\Library\NIST14.L           |        |              |    |
|    |        |      | 1-Chloroeicosane                         | 175300 | 042217-02-7  | 93 |
|    |        |      | Hexadecane, 2,6,10,14-tetramethyl-       | 142260 | 000638-36-8  | 83 |
|    |        |      | Carbonic acid, eicosyl vinyl ester       | 219345 | 1000382-54-3 | 76 |
| 69 | 35.767 | 0.89 | C:\MassHunter\Library\NIST14.L           |        |              |    |
|    |        |      | Octanamide, N,N-dimethyl-                | 40697  | 001118-92-9  | 87 |
|    |        |      | N,N-Dimethyldodecanamide                 | 90491  | 003007-53-2  | 72 |
|    |        |      | 3-Cyclopentylpropionamide, N,N-dimethyl- | 39063  | 1000340-38-0 | 64 |
| 70 | 36.097 | 0.83 | C:\MassHunter\Library\NIST14.L           |        |              |    |
|    |        |      | Carbonic acid, eicosyl vinyl ester       | 219345 | 1000382-54-3 | 76 |
|    |        |      | Sulfurous acid, butyl heptadecyl ester   | 224827 | 1000309-18-4 | 74 |
|    |        |      | Nonadecane, 1-chloro-                    | 161769 | 062016-76-6  | 70 |
| 71 | 36.662 | 1.23 | C:\MassHunter\Library\NIST14.L           |        |              |    |



|    |        |      |                                    |        |              |    |
|----|--------|------|------------------------------------|--------|--------------|----|
|    |        |      | Octadecane, 1-chloro-              | 148105 | 003386-33-2  | 78 |
|    |        |      | Nonadecane, 1-chloro-              | 161769 | 062016-76-6  | 78 |
|    |        |      | Octadecane, 3-methyl-              | 128847 | 006561-44-0  | 62 |
| 72 | 36.785 | 0.78 | C:\MassHunter\Library\NIST14.L     |        |              |    |
|    |        |      | Docosane                           | 169409 | 000629-97-0  | 96 |
|    |        |      | Heptadecane, 3-methyl-             | 115552 | 006418-44-6  | 81 |
|    |        |      | Dotriacontane, 1-iodo-             | 272203 | 1000406-32-4 | 81 |
| 73 | 37.120 | 0.63 | C:\MassHunter\Library\NIST14.L     |        |              |    |
|    |        |      | 2-Methyltetracosane                | 207500 | 001560-78-7  | 87 |
|    |        |      | Hentriacontane                     | 252711 | 000630-04-6  | 83 |
|    |        |      | Tetracosane, 11-decyl-             | 262990 | 055429-84-0  | 83 |
| 74 | 37.297 | 2.30 | C:\MassHunter\Library\NIST14.L     |        |              |    |
|    |        |      | Heptadecane                        | 102600 | 000629-78-7  | 91 |
|    |        |      | Hexadecane, 2,6,10,14-tetramethyl- | 142260 | 000638-36-8  | 89 |
|    |        |      | Tetracosane, 9-octyl-              | 256759 | 055401-54-2  | 87 |
| 75 | 38.009 | 1.50 | C:\MassHunter\Library\NIST14.L     |        |              |    |
|    |        |      | Hexadecane                         | 89844  | 000544-76-3  | 92 |
|    |        |      | Hexadecane                         | 89838  | 000544-76-3  | 91 |
|    |        |      | Hexadecane                         | 89842  | 000544-76-3  | 91 |
| 76 | 38.156 | 0.53 | C:\MassHunter\Library\NIST14.L     |        |              |    |
|    |        |      | Heneicosane                        | 155886 | 000629-94-7  | 93 |
|    |        |      | Heptadecane, 3-methyl-             | 115552 | 006418-44-6  | 89 |
|    |        |      | Nonadecane, 9-methyl-              | 142247 | 013287-24-6  | 78 |
| 77 | 38.326 | 0.67 | C:\MassHunter\Library\NIST14.L     |        |              |    |
|    |        |      | Hexadecane, 1-iodo-                | 206777 | 000544-77-4  | 91 |
|    |        |      | Henicos-1-ene                      | 153971 | 001599-68-4  | 89 |
|    |        |      | Carbonic acid, eicosyl vinyl ester | 219345 | 1000382-54-3 | 87 |
| 78 | 38.532 | 1.10 | C:\MassHunter\Library\NIST14.L     |        |              |    |
|    |        |      | Phenol, 2,2'-methylenebis[6-(1,1-d | 197659 | 000119-47-1  | 99 |
|    |        |      | imethylethyl)-4-methyl-            |        |              |    |
|    |        |      | Phenol, 2,2'-methylenebis[6-(1,1-d | 197660 | 000119-47-1  | 70 |
|    |        |      | imethylethyl)-4-methyl-            |        |              |    |
|    |        |      | Phenol, 2,2'-methylenebis[6-(1,1-d | 197661 | 000119-47-1  | 68 |
|    |        |      | imethylethyl)-4-methyl-            |        |              |    |
| 79 | 39.144 | 0.88 | C:\MassHunter\Library\NIST14.L     |        |              |    |
|    |        |      | N,N-Dimethyldodecanamide           | 90491  | 003007-53-2  | 55 |
|    |        |      | 3-Cyclopentylpropionamide, N,N-dim | 39063  | 1000340-38-0 | 50 |
|    |        |      | ethyl-                             |        |              |    |
|    |        |      | 2-Tridecanone, 0-methyloxime       | 90497  | 036379-38-1  | 43 |
| 80 | 39.420 | 0.86 | C:\MassHunter\Library\NIST14.L     |        |              |    |
|    |        |      | Hexadecane                         | 89839  | 000544-76-3  | 95 |
|    |        |      | 1-Chloroeicosane                   | 175300 | 042217-02-7  | 93 |
|    |        |      | Nonahexacontanoic acid             | 276185 | 040710-32-5  | 91 |
| 81 | 39.838 | 1.56 | C:\MassHunter\Library\NIST14.L     |        |              |    |
|    |        |      | Nonadecane                         | 128833 | 000629-92-5  | 91 |
|    |        |      | Docosane                           | 169409 | 000629-97-0  | 90 |
|    |        |      | Hexadecane, 1-iodo-                | 206777 | 000544-77-4  | 90 |
| 82 | 40.038 | 2.04 | C:\MassHunter\Library\NIST14.L     |        |              |    |
|    |        |      | Nonadecane, 1-chloro-              | 161769 | 062016-76-6  | 83 |
|    |        |      | Carbonic acid, eicosyl vinyl ester | 219345 | 1000382-54-3 | 81 |
|    |        |      | Tetracosane                        | 195672 | 000646-31-1  | 76 |

|    |        |      |                                                                                                                                                                               |                                                                           |
|----|--------|------|-------------------------------------------------------------------------------------------------------------------------------------------------------------------------------|---------------------------------------------------------------------------|
| 83 | 40.514 | 3.84 | C:\MassHunter\Library\NIST14.L<br>Bis(2-ethylhexyl) phthalate<br>Di-n-octyl phthalate<br>Diisooctyl phthalate                                                                 | 233372 000117-81-7 99<br>233365 000117-84-0 91<br>233366 000131-20-4 91   |
| 84 | 40.885 | 0.90 | C:\MassHunter\Library\NIST14.L<br>Heneicosane<br>Hexadecane, 1-iodo-<br>Octadecane, 2,6,10,14-tetramethyl-                                                                    | 155886 000629-94-7 97<br>206777 000544-77-4 92<br>169419 054964-82-8 91   |
| 85 | 41.244 | 2.51 | C:\MassHunter\Library\NIST14.L<br>3-Methylhexacosane<br>2-methyloctacosane<br>Dotriacontane, 1-iodo-                                                                          | 227471 065820-56-6 91<br>242320 1000376-72-8 87<br>272203 1000406-32-4 87 |
| 86 | 42.085 | 0.70 | C:\MassHunter\Library\NIST14.L<br>1-Bromodocosane<br>Hexadecane, 1-iodo-<br>Heneicosane                                                                                       | 232142 006938-66-5 92<br>206777 000544-77-4 92<br>155886 000629-94-7 92   |
| 87 | 43.161 | 1.14 | C:\MassHunter\Library\NIST14.L<br>Docosane<br>Octadecane, 3-methyl-<br>13-Methylheptacosane                                                                                   | 169409 000629-97-0 95<br>128847 006561-44-0 93<br>235622 015689-72-2 90   |
| 88 | 43.391 | 0.76 | C:\MassHunter\Library\NIST14.L<br>1,4-Benzenedicarboxylic acid, bis(2-ethylhexyl) ester<br>Carbonic acid, decyl 2-ethylhexyl ester<br>Carbonic acid, 2-ethylhexyl nonyl ester | 233538 006422-86-2 43<br>173326 1000383-13-7 38<br>159890 1000383-13-6 38 |
| 89 | 43.679 | 2.00 | C:\MassHunter\Library\NIST14.L<br>Octadecane<br>2,6,10-Trimethyltridecane<br>Heneicosane, 11-decyl-                                                                           | 115545 000593-45-3 91<br>89861 003891-99-4 80<br>252715 055320-06-4 76    |
| 90 | 43.838 | 1.70 | C:\MassHunter\Library\NIST14.L<br>13-Docosenamide, (Z)-<br>13-Docosenamide, (Z)-<br>13-Docosenamide, (Z)-                                                                     | 194617 000112-84-5 97<br>194619 000112-84-5 92<br>194618 000112-84-5 83   |
| 91 | 44.561 | 0.21 | C:\MassHunter\Library\NIST14.L<br>Heptacosane, 1-chloro-<br>Heneicosane<br>Nonadecane                                                                                         | 245034 062016-79-9 96<br>155886 000629-94-7 89<br>128835 000629-92-5 86   |
| 92 | 50.937 | 0.19 | C:\MassHunter\Library\NIST14.L<br>Di-n-decylsulfone<br>1H-Indole, 5-methyl-2-phenyl-<br>Heneicosane, 3-methyl-                                                                | 202597 111530-37-1 53<br>71661 013228-36-9 49<br>169412 006418-47-9 45    |
| 93 | 51.178 | 0.27 | C:\MassHunter\Library\NIST14.L<br>Eicosane<br>Heptadecane<br>Heneicosane                                                                                                      | 142239 000112-95-8 60<br>102600 000629-78-7 60<br>155886 000629-94-7 53   |
