# Supplementary material for: Preparation of Amphiphilic Chitosan-Loaded Bentonite Adsorbent and Its Performance in Removing Organic Matter from Coking Wastewater
Source: MDPI journal article supplement (doi:10.3390/polym15061588), 2023-03-22
Supplement: s1 [file s1]

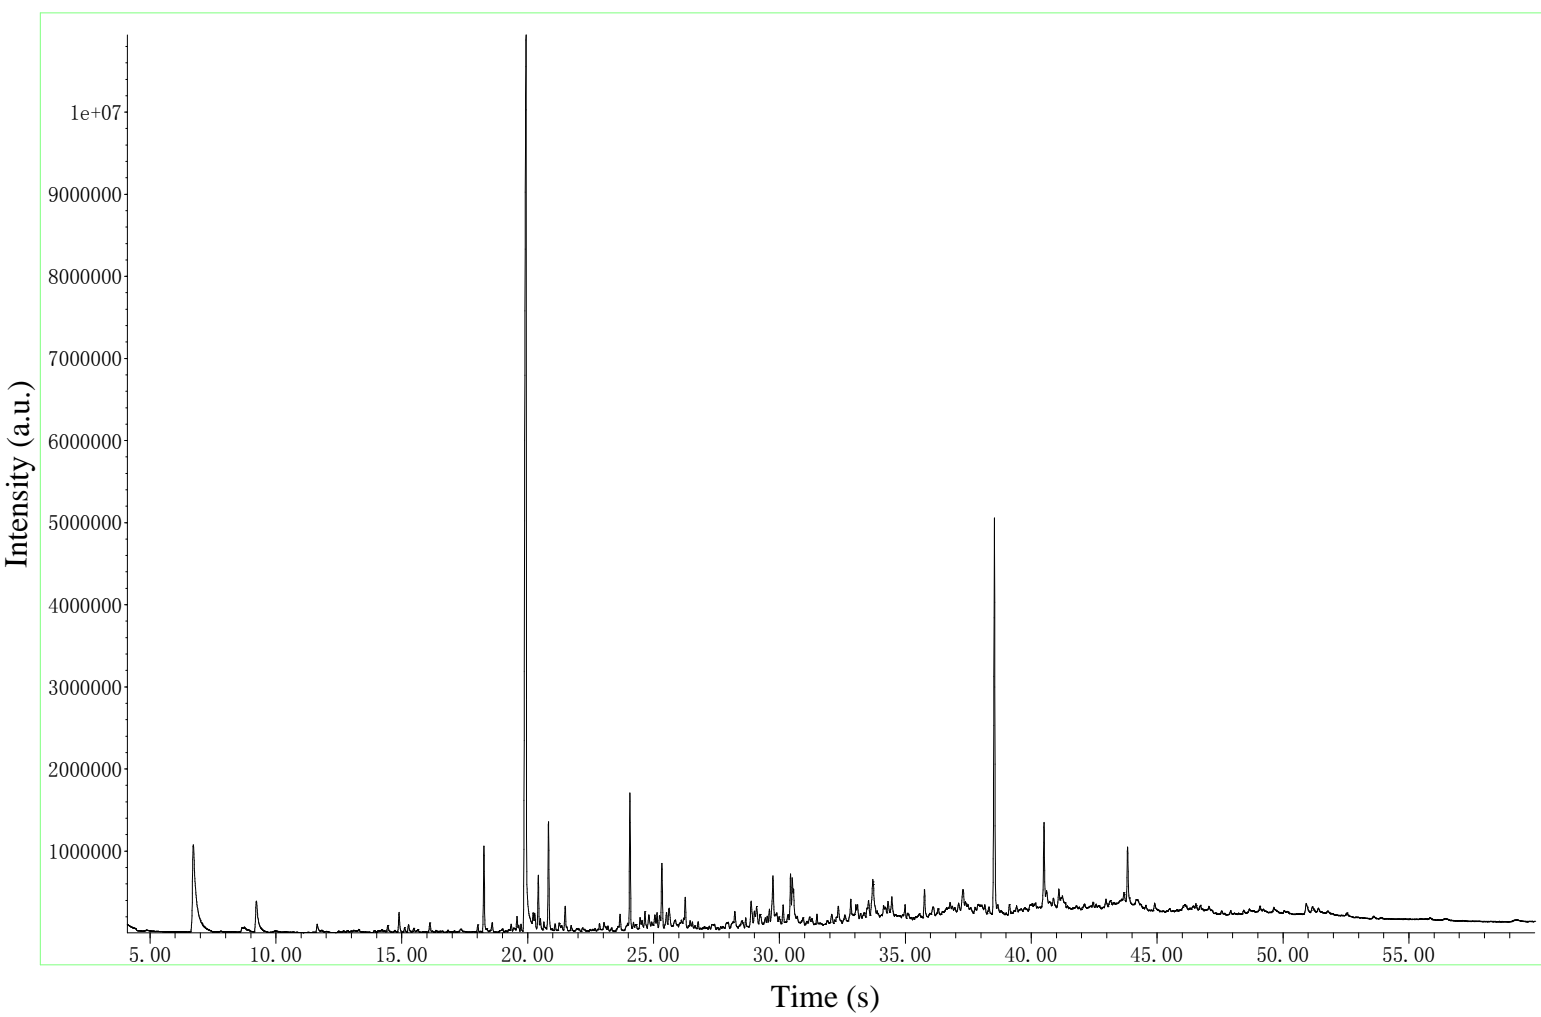

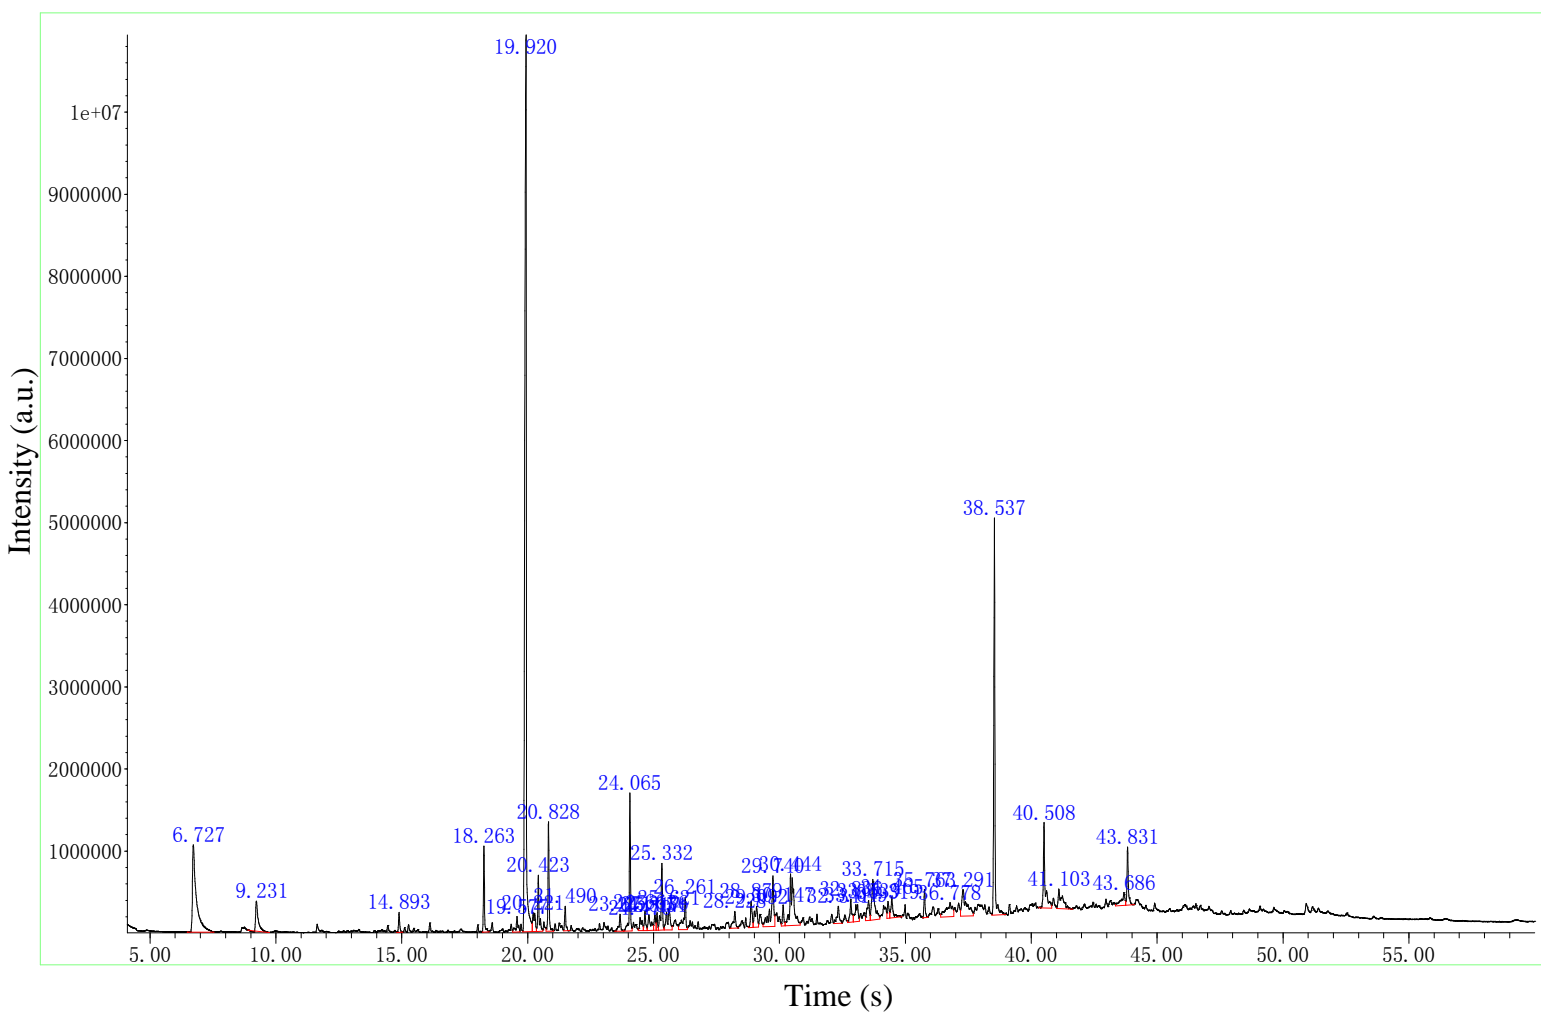

## Spectrum Search Report

| No. | R. T.  | S%    | Spectrum Library/ID                                                                                                         | Reference#                 | CAS#                                       | Match          |
|-----|--------|-------|-----------------------------------------------------------------------------------------------------------------------------|----------------------------|--------------------------------------------|----------------|
| 1   | 6.728  | 7.05  | C:\MassHunter\Library\NIST14.L<br>Phenol<br>Phenol<br>Phenol                                                                | 2620<br>2619<br>2621       | 000108-95-2<br>000108-95-2<br>000108-95-2  | 94<br>91<br>91 |
| 2   | 9.228  | 1.54  | C:\MassHunter\Library\NIST14.L<br>p-Cresol<br>Phenol, 3-methyl-<br>p-Cresol                                                 | 5464<br>5469<br>5462       | 000106-44-5<br>000108-39-4<br>000106-44-5  | 97<br>96<br>94 |
| 3   | 14.892 | 0.51  | C:\MassHunter\Library\NIST14.L<br>Sulfurous acid, hexyl pentyl ester<br>Dodecane, 2,6,11-trimethyl-<br>Tetradecane, 1-iodo- | 97941<br>76621<br>181794   | 1000309-14-1<br>031295-56-4<br>019218-94-1 | 58<br>58<br>58 |
| 4   | 18.263 | 1.89  | C:\MassHunter\Library\NIST14.L<br>Dodecanal<br>Dodecanal<br>Dodecanal                                                       | 51252<br>51251<br>51253    | 000112-54-9<br>000112-54-9<br>000112-54-9  | 98<br>91<br>91 |
| 5   | 19.580 | 0.66  | C:\MassHunter\Library\NIST14.L<br>Tridecane<br>Hexadecane<br>Hexadecane                                                     | 51393<br>89842<br>89838    | 000629-50-5<br>000544-76-3<br>000544-76-3  | 93<br>91<br>86 |
| 6   | 19.922 | 30.12 | C:\MassHunter\Library\NIST14.L<br>1-Decene<br>1-Dodecanol<br>1-Dodecanol                                                    | 18385<br>53008<br>53012    | 000872-05-9<br>000112-53-8<br>000112-53-8  | 95<br>95<br>95 |
| 7   | 20.221 | 0.96  | C:\MassHunter\Library\NIST14.L<br>Tetratetracontane<br>Dodecane, 3-methyl-<br>Hentriacontane                                | 273586<br>51413<br>252712  | 007098-22-8<br>017312-57-1<br>000630-04-6  | 80<br>64<br>64 |
| 8   | 20.421 | 1.60  | C:\MassHunter\Library\NIST14.L<br>Heneicosane<br>Octadecane, 1-iodo-<br>Decane, 2,3,7-trimethyl-                            | 155888<br>226953<br>51447  | 000629-94-7<br>000629-93-6<br>062238-13-5  | 72<br>72<br>64 |
| 9   | 20.827 | 2.55  | C:\MassHunter\Library\NIST14.L<br>2,4-Di-tert-butylphenol<br>2,4-Di-tert-butylphenol<br>2,4-Di-tert-butylphenol             | 70634<br>70633<br>70632    | 000096-76-4<br>000096-76-4<br>000096-76-4  | 97<br>93<br>92 |
| 10  | 21.492 | 0.63  | C:\MassHunter\Library\NIST14.L<br>2-Bromo dodecane<br>Hexadecane, 1-iodo-<br>Heneicosane                                    | 109279<br>206779<br>155887 | 013187-99-0<br>000544-77-4<br>000629-94-7  | 90<br>80<br>72 |
| 11  | 23.668 | 0.63  | C:\MassHunter\Library\NIST14.L<br>Heneicosane<br>Hexadecane<br>Triacontane                                                  | 155888<br>89844<br>247876  | 000629-94-7<br>000544-76-3<br>000638-68-6  | 86<br>86<br>86 |
| 12  | 24.062 | 3.22  | C:\MassHunter\Library\NIST14.L<br>Tributyl phosphate<br>Tributyl phosphate<br>Tributyl phosphate                            | 126012<br>126016<br>126015 | 000126-73-8<br>000126-73-8<br>000126-73-8  | 91<br>91<br>86 |
| 13  | 24.468 | 0.66  | C:\MassHunter\Library\NIST14.L<br>1,3,5-Triazine-2,4,6(1H,3H,5H)-tri                                                        | 110268                     | 001025-15-6                                | 99             |

---

one, 1,3,5-tri-2-propenyl-  
1,3,5-Triazine-2,4,6(1H,3H,5H)-tri 110269 001025-15-6 98  
one, 1,3,5-tri-2-propenyl-  
1,3,5-Triazine-2,4,6(1H,3H,5H)-tri 110270 001025-15-6 93  
one, 1,3,5-tri-2-propenyl-

|    |        |      |                                |        |              |    |
|----|--------|------|--------------------------------|--------|--------------|----|
| 14 | 24.662 | 0.57 | C:\MassHunter\Library\NIST14.L |        |              |    |
|    |        |      | Triacotane                     | 247876 | 000638-68-6  | 86 |
|    |        |      | Heptadecane                    | 102600 | 000629-78-7  | 80 |
|    |        |      | Dodecane, 2-methyl-            | 51414  | 001560-97-0  | 74 |
| 15 | 24.815 | 0.85 | C:\MassHunter\Library\NIST14.L |        |              |    |
|    |        |      | Hexadecane                     | 89842  | 000544-76-3  | 91 |
|    |        |      | Tridecane, 5-propyl-           | 89847  | 055045-11-9  | 80 |
|    |        |      | Tridecane, 3-methyl-           | 63633  | 006418-41-3  | 80 |
| 16 | 25.056 | 0.47 | C:\MassHunter\Library\NIST14.L |        |              |    |
|    |        |      | Heneicosane                    | 155888 | 000629-94-7  | 80 |
|    |        |      | 2-Bromotetradecane             | 136205 | 074036-95-6  | 72 |
|    |        |      | Decane, 2,3,5-trimethyl-       | 51454  | 062238-11-3  | 72 |
| 17 | 25.133 | 0.44 | C:\MassHunter\Library\NIST14.L |        |              |    |
|    |        |      | Hexadecane                     | 89844  | 000544-76-3  | 91 |
|    |        |      | Hexadecane                     | 89842  | 000544-76-3  | 87 |
|    |        |      | Pentadecane                    | 76609  | 000629-62-9  | 83 |
| 18 | 25.333 | 1.98 | C:\MassHunter\Library\NIST14.L |        |              |    |
|    |        |      | Heneicosane                    | 155888 | 000629-94-7  | 72 |
|    |        |      | 2-Bromotetradecane             | 136205 | 074036-95-6  | 72 |
|    |        |      | Tetratetracontane              | 273586 | 007098-22-8  | 64 |
| 19 | 25.621 | 1.49 | C:\MassHunter\Library\NIST14.L |        |              |    |
|    |        |      | Dibenzylamine                  | 62549  | 000103-49-1  | 91 |
|    |        |      | Dibenzylamine                  | 62548  | 000103-49-1  | 68 |
|    |        |      | Dibenzylamine                  | 62547  | 000103-49-1  | 64 |
| 20 | 26.262 | 1.53 | C:\MassHunter\Library\NIST14.L |        |              |    |
|    |        |      | Pentacosane                    | 207499 | 000629-99-2  | 86 |
|    |        |      | Hexadecane, 2-methyl-          | 102609 | 001560-92-5  | 59 |
|    |        |      | Dodecane, 4,6-dimethyl-        | 63643  | 061141-72-8  | 53 |
| 21 | 28.227 | 0.79 | C:\MassHunter\Library\NIST14.L |        |              |    |
|    |        |      | Decane, 3,8-dimethyl-          | 40006  | 017312-55-9  | 87 |
|    |        |      | Octacosane                     | 235614 | 000630-02-4  | 86 |
|    |        |      | Hexadecane, 2-methyl-          | 102609 | 001560-92-5  | 86 |
| 22 | 28.880 | 0.88 | C:\MassHunter\Library\NIST14.L |        |              |    |
|    |        |      | Hexadecane, 1-chloro-          | 121206 | 004860-03-1  | 93 |
|    |        |      | Octadecane, 1-chloro-          | 148105 | 003386-33-2  | 90 |
|    |        |      | Hexadecane, 1-chloro-          | 121204 | 004860-03-1  | 89 |
| 23 | 29.092 | 1.15 | C:\MassHunter\Library\NIST14.L |        |              |    |
|    |        |      | Heneicosane                    | 155888 | 000629-94-7  | 91 |
|    |        |      | 2-Bromotetradecane             | 136205 | 074036-95-6  | 86 |
|    |        |      | Octacosane                     | 235614 | 000630-02-4  | 86 |
| 24 | 29.739 | 2.85 | C:\MassHunter\Library\NIST14.L |        |              |    |
|    |        |      | Heneicosane                    | 155888 | 000629-94-7  | 90 |
|    |        |      | Eicosane, 1-iodo-              | 241993 | 1000406-31-8 | 72 |
|    |        |      | Hexadecane, 2-methyl-          | 102609 | 001560-92-5  | 64 |
| 25 | 30.144 | 0.62 | C:\MassHunter\Library\NIST14.L |        |              |    |

|    |        |      |                                    |        |              |    |
|----|--------|------|------------------------------------|--------|--------------|----|
|    |        |      | Benzenepropanoic acid, 3,5-bis(1,1 | 151926 | 006386-38-5  | 99 |
|    |        |      | -dimethylethyl)-4-hydroxy-, methyl |        |              |    |
|    |        |      | ester                              |        |              |    |
|    |        |      | Benzenepropanoic acid, 3,5-bis(1,1 | 151925 | 006386-38-5  | 91 |
|    |        |      | -dimethylethyl)-4-hydroxy-, methyl |        |              |    |
|    |        |      | ester                              |        |              |    |
|    |        |      | Benzenepropanoic acid, 3,5-bis(1,1 | 151924 | 006386-38-5  | 89 |
|    |        |      | -dimethylethyl)-4-hydroxy-, methyl |        |              |    |
|    |        |      | ester                              |        |              |    |
| 26 | 30.444 | 4.12 | C:\MassHunter\Library\NIST14.L     |        |              |    |
|    |        |      | n-Hexadecanoic acid                | 117419 | 000057-10-3  | 97 |
|    |        |      | n-Hexadecanoic acid                | 117417 | 000057-10-3  | 89 |
|    |        |      | Ether, dodecyl isopropyl           | 91586  | 029379-42-8  | 58 |
| 27 | 32.338 | 0.82 | C:\MassHunter\Library\NIST14.L     |        |              |    |
|    |        |      | Heneicosane                        | 155888 | 000629-94-7  | 93 |
|    |        |      | 1,3-Propanediol, ethyl octadecyl e | 210760 | 1000406-35-4 | 90 |
|    |        |      | ther                               |        |              |    |
|    |        |      | Nonadecane, 9-methyl-              | 142247 | 013287-24-6  | 89 |
| 28 | 32.838 | 0.91 | C:\MassHunter\Library\NIST14.L     |        |              |    |
|    |        |      | 1-Octadecene                       | 113633 | 000112-88-9  | 97 |
|    |        |      | 1-Octadecene                       | 113632 | 000112-88-9  | 96 |
|    |        |      | Pentadecafluorooctanoic acid, octa | 274630 | 1000406-04-8 | 93 |
|    |        |      | decyl ester                        |        |              |    |
| 29 | 33.050 | 1.09 | C:\MassHunter\Library\NIST14.L     |        |              |    |
|    |        |      | Hentriacontane                     | 252711 | 000630-04-6  | 90 |
|    |        |      | Dotriacontane, 1-iodo-             | 272203 | 1000406-32-4 | 90 |
|    |        |      | Eicosane, 7-hexyl-                 | 217896 | 055333-99-8  | 87 |
| 30 | 33.538 | 0.94 | C:\MassHunter\Library\NIST14.L     |        |              |    |
|    |        |      | Heptadecane, 9-octyl-              | 207503 | 007225-64-1  | 91 |
|    |        |      | Hentriacontane                     | 252711 | 000630-04-6  | 91 |
|    |        |      | Pentacosane                        | 207499 | 000629-99-2  | 91 |
| 31 | 33.715 | 2.52 | C:\MassHunter\Library\NIST14.L     |        |              |    |
|    |        |      | Octadecane                         | 115547 | 000593-45-3  | 45 |
|    |        |      | Eicosane                           | 142238 | 000112-95-8  | 43 |
|    |        |      | Tetracosane, 1-iodo-               | 260060 | 1000406-32-0 | 42 |
| 32 | 34.321 | 0.57 | C:\MassHunter\Library\NIST14.L     |        |              |    |
|    |        |      | Pentacosane                        | 207499 | 000629-99-2  | 91 |
|    |        |      | Hentriacontane                     | 252712 | 000630-04-6  | 90 |
|    |        |      | Docosane, 1-iodo-                  | 252495 | 1000406-31-9 | 87 |
| 33 | 34.468 | 0.96 | C:\MassHunter\Library\NIST14.L     |        |              |    |
|    |        |      | Octadecane                         | 115547 | 000593-45-3  | 93 |
|    |        |      | Heptacosane                        | 227469 | 000593-49-7  | 90 |
|    |        |      | Octacosane                         | 235614 | 000630-02-4  | 80 |
| 34 | 35.762 | 0.71 | C:\MassHunter\Library\NIST14.L     |        |              |    |
|    |        |      | Octanamide, N,N-dimethyl-          | 40697  | 001118-92-9  | 87 |
|    |        |      | N,N-Dimethyldodecanamide           | 90491  | 003007-53-2  | 72 |
|    |        |      | 3-Cyclopentylpropionamide, N,N-dim | 39063  | 1000340-38-0 | 64 |
|    |        |      | ethyl-                             |        |              |    |
| 35 | 36.779 | 1.75 | C:\MassHunter\Library\NIST14.L     |        |              |    |
|    |        |      | Hentriacontane                     | 252712 | 000630-04-6  | 91 |
|    |        |      | Heptacosane                        | 227468 | 000593-49-7  | 91 |
|    |        |      | Octacosane                         | 235614 | 000630-02-4  | 90 |

---

|    |        |       |                                                           |        |              |    |
|----|--------|-------|-----------------------------------------------------------|--------|--------------|----|
| 36 | 37.291 | 2.61  | C:\MassHunter\Library\NIST14.L                            |        |              |    |
|    |        |       | Hexadecane, 2-methyl-                                     | 102609 | 001560-92-5  | 90 |
|    |        |       | Pentacosane                                               | 207499 | 000629-99-2  | 76 |
|    |        |       | Hentriacontane                                            | 252711 | 000630-04-6  | 76 |
| 37 | 38.538 | 10.05 | C:\MassHunter\Library\NIST14.L                            |        |              |    |
|    |        |       | Phenol, 2,2'-methylenebis[6-(1,1-dimethylethyl)-4-methyl- | 197659 | 000119-47-1  | 93 |
|    |        |       | Phenol, 2,2'-methylenebis[6-(1,1-dimethylethyl)-4-methyl- | 197662 | 000119-47-1  | 87 |
|    |        |       | Phenol, 2,2'-methylenebis[6-(1,1-dimethylethyl)-4-methyl- | 197660 | 000119-47-1  | 74 |
| 38 | 40.508 | 3.13  | C:\MassHunter\Library\NIST14.L                            |        |              |    |
|    |        |       | Bis(2-ethylhexyl) phthalate                               | 233372 | 000117-81-7  | 91 |
|    |        |       | Bis(2-ethylhexyl) phthalate                               | 233373 | 000117-81-7  | 87 |
|    |        |       | Phthalic acid, di(2-propylpentyl) ester                   | 233419 | 1000377-93-5 | 87 |
| 39 | 41.102 | 1.60  | C:\MassHunter\Library\NIST14.L                            |        |              |    |
|    |        |       | 1,3-Propanediol, ethyl hexacosyl ether                    | 261144 | 1000406-35-8 | 35 |
|    |        |       | Hexadecane, 2-methyl-                                     | 102608 | 001560-92-5  | 25 |
|    |        |       | 1,3-Propanediol, docosyl ether                            | 244133 | 1000406-35-6 | 20 |
| 40 | 43.685 | 0.94  | C:\MassHunter\Library\NIST14.L                            |        |              |    |
|    |        |       | Octadecane, 1-iodo-                                       | 226951 | 000629-93-6  | 96 |
|    |        |       | Hexadecane, 2-methyl-                                     | 102609 | 001560-92-5  | 93 |
|    |        |       | Octadecane, 3-methyl-                                     | 128847 | 006561-44-0  | 93 |
| 41 | 43.832 | 1.65  | C:\MassHunter\Library\NIST14.L                            |        |              |    |
|    |        |       | 13-Docosenamide, (Z)-                                     | 194619 | 000112-84-5  | 94 |
|    |        |       | 13-Docosenamide, (Z)-                                     | 194618 | 000112-84-5  | 90 |
|    |        |       | 9-Octadecenamide, (Z)-                                    | 141028 | 000301-02-0  | 89 |
