# Supplementary material for: Preparation of Amphiphilic Chitosan-Loaded Bentonite Adsorbent and Its Performance in Removing Organic Matter from Coking Wastewater
Source: MDPI journal article supplement (doi:10.3390/polym15061588), 2023-03-22
Supplement: s1 [file s1]

# Preparation of Amphiphilic Chitosan-loaded Bentonite Adsorbent and Its Performance in Removing Organic Matter from Coking Wastewater

Zhou Zhu <sup>1,2,\*</sup>, Haiqun Kou <sup>1,2</sup>, Yuchang Zhou <sup>1</sup>, Xindian Lan <sup>1</sup>, Meiying Yu <sup>1</sup>, Haonan Chen <sup>1</sup>

<sup>1</sup> School of Ecology and Environment, Yuzhang Normal University, Nanchang 330103, P. R. China

<sup>2</sup> Key Laboratory of Green New Materials and Industrial Wastewater Treatment of Nanchang City, Yuzhang

Normal University, Nanchang 330103, P. R. China

Corresponding author e-mail: zhuzhou20000@126.com

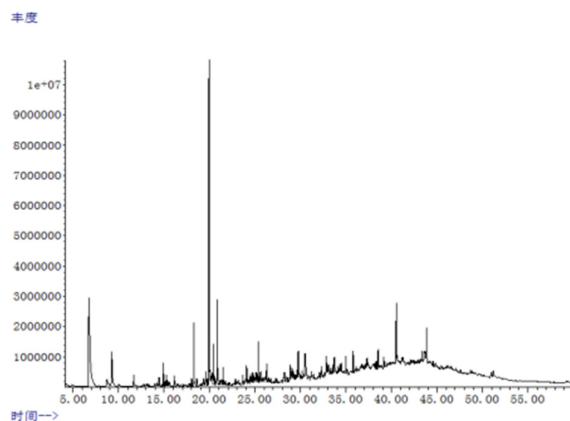

(a) Raw Wastewater

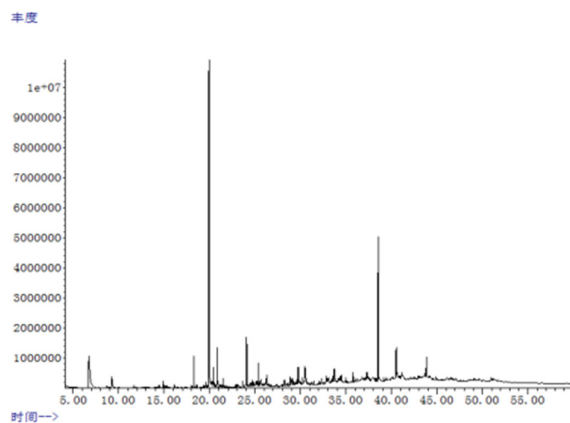

(b) C18CS-BT treated coking wastewater

**Figure S1.** Total ion flow diagram of coking wastewater before and after C18CS-BT treatment.
